# Supplementary material for: Neotropical cloud forests and páramo to contract and dry from declines in cloud immersion and frost
Source: PLoS One. 2019 Apr 17;14(4):e0213155. doi: 10.1371/journal.pone.0213155 (PMC6469753; doi:10.1371/journal.pone.0213155)
Supplement: S13 Table — (DOCX) [file pone.0213155.s018.docx]

**S13 Table. Regional cloud immersion changes by protection status for RCP 8.5, 2061-2080** (Representative Concentration Pathway 8.5, average year 2070). Changes in cloud immersion are given by change categorya and protection statusb for: montane TMCF no subalpine occurs (No Subalpine), montane + mixed TMCF (Mixed), or montane + subalpine 1 or subalpine 2 TMCF, as percentages of TMCF zone areasc. Subalpine 1 TMCF transitions to páramo; Subalpine 2 TMCF transitions to puna.

| **Region** | **Subalpine Type** | **PR or UPR** | **Montane + Subalpine TMCF Zone Area (km2)b** | **Below CFmin**  **(%)** | **RH­d ≤ -3% or**  **RH<Rhmin**  **(%)** | **-3%< RHd <0%**  **(%)** | **RHd ≥ 0%**  **Total Lost**  **(%)** | **RHd ≥ 0%**  **Left**  **(%)** | **RHd** **≥ 0%**  **Added**  **(%)** | **RHd ≥ 0%**  **Net Left**  **(%)** |
| --- | --- | --- | --- | --- | --- | --- | --- | --- | --- | --- |
| **Caribbean** | Mixed | UPR | 676 | 23 | 77 | - | 100 | - | - | - | |
|  |  | **PR** | **1,449** | **6.8** | **93** | **-** | **100** | **-** | **-** | **0.0** | |
|  | No Subalpine | UPR | 454 | 37 | 63 | - | 100 | - | - | - | |
|  |  | **PR** | **900** | **19** | **81** | **0** | **100** | **-** | **-** | **-** | |
| **Mesoamerica** | Subalpine 1 | UPR | 2,978 | 18 | 22 | 60 | 100 | - | - | - | |
|  |  | **PR** | **4,619** | **10** | **12** | **78** | **100** | **-** | **-** | **-** | |
|  | Mixed | UPR | 36,520 | 24 | 68 | 8.2 | 100 | - | - | - | |
|  |  | **PR** | **9,878** | **18** | **81** | **0.8** | **100** | **-** | **-** | **-** | |
|  | No Subalpine | UPR | 1,047 | 46 | 24 | 30 | 100 | - | - | - | |
|  |  | **PR** | **975** | **28** | **20** | **52** | **100** | **-** | **-** | **-** | |
| **South America** | Subalpine 1 | UPR | 152,200 | 15 | 3.6 | 66 | 85 | 15 | 2.7 | 18 | |
|  |  | **PR** | **44,060** | **11** | **8.2** | **73** | **92** | **8.0** | **2.4** | **10** | |
|  | Subalpine 2 | UPR | 55,460 | 19 | 4.0 | 55 | 78 | 22 | 5.8 | 28 | |
|  |  | **PR** | **37,020** | **27** | **12** | **56** | **95** | **5.0** | **1.4** | **6.4** | |
|  | Mixed | UPR | 28,230 | 24 | 8.2 | 31 | 63 | 37 | 21 | 58 | |
|  |  | **PR** | **17,390** | **39** | **25** | **16** | **81** | **19** | **6.2** | **26** | |
|  | No Subalpine | UPR | 3,631 | 45 | 7.6 | 38 | 91 | 8.9 | 0.6 | 9.4 | |
|  |  | **PR** | **3,736** | **22** | **21** | **30** | **73** | **27** | **3.3** | **30** | |

aChange categories: Below CFmin = falls below CF­min (other categories remain above CFmin ); RHd ≤ -3% or < RHmin = RH falls severely; -3% < RHd < 0% = RH falls up to 3%; RHd ≥ 0% = RH is stable or increases. bUPR = unprotected, PR = protected. cBased on maps with a ~250-m cell size.
